# Supplementary material for: Exogenous Expression of Human Protamine 1 (hPrm1) Remodels Fibroblast Nuclei into Spermatid-like Structures
Source: PubMed Central journal article supplement — Cell Rep. 2015 Nov 25;13(9):1765–71. doi: 10.1016/j.celrep.2015.10.066 (PMC4675893; doi:10.1016/j.celrep.2015.10.066), 2015-11-25
Supplement: mmc3.pdf [file mmc3.pdf]

## Exogenous Expression of Human Protamine 1 (hPrm1) Remodels Fibroblast Nuclei into Spermatid-like Structures

### Graphical Abstract

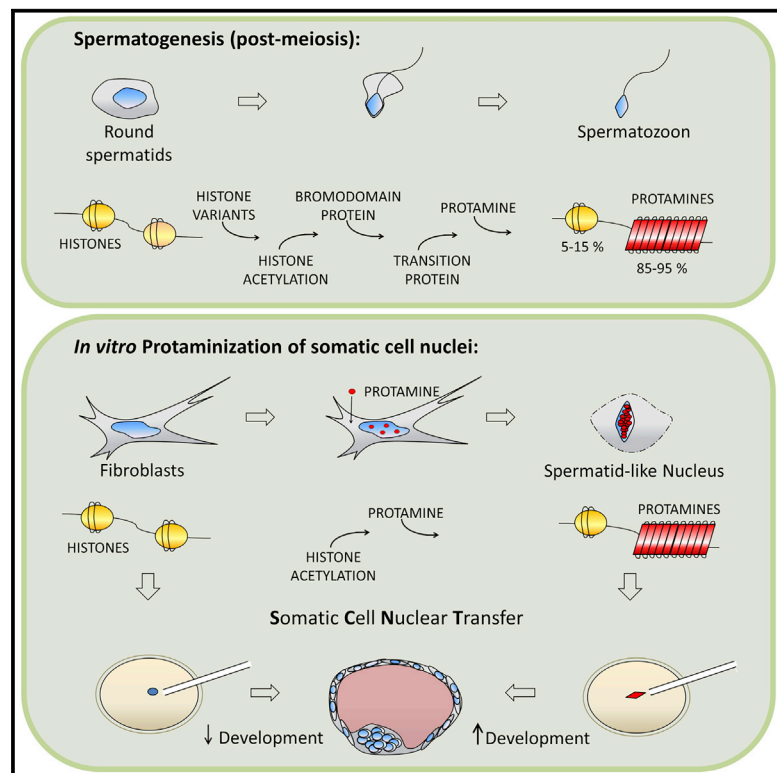

### Authors

Domenico Iuso, Marta Czernik, Paola Toschi, ..., Saadi Khochbin, Grazyna Ewa Ptak, Pasqualino Loi

### Correspondence

ploi@unite.it

### In Brief

Iuso et al. find that exogenous expression of human protamine 1 remodels interphase fibroblast nuclei into spermatid-like structures. The process is reversible upon nuclear transfer into enucleated oocytes. This finding could be exploited as a simplified model for investigating protamine-induced genome compaction and may also boost somatic cell nuclear transfer efficiency.

### Highlights

- In vitro protaminization of somatic cell nuclei
- Conversion of interphase somatic nuclei into “spermatid-like” structures
- Protaminization of somatic nuclei that is reversed upon injection into enucleated oocytes
- A simplified model of nuclear remodeling and reprogramming in vitro

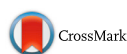

# Exogenous Expression of Human Protamine 1 (hPrm1) Remodels Fibroblast Nuclei into Spermatid-like Structures

Domenico Iuso,<sup>1,6</sup> Marta Czernik,<sup>1,6</sup> Paola Toschi,<sup>1</sup> Antonella Fidanza,<sup>1</sup> Federica Zacchini,<sup>2</sup> Robert Feil,<sup>4</sup> Sandrine Curtet,<sup>5</sup> Thierry Buchou,<sup>5</sup> Hitoshi Shiota,<sup>5</sup> Saadi Khochbin,<sup>5</sup> Grazyna Ewa Ptak,<sup>1,2,3</sup> and Pasqualino Loi<sup>1,\*</sup>

<sup>1</sup>Faculty of Veterinary Medicine, University of Teramo, Renato Balzarini Street 1, Campus Coste Sant'Agostino, 64100 Teramo, Italy

<sup>2</sup>Institute of Genetics and Animal Breeding of the Polish Academy of Sciences, Postępu 36A, Jastrzębiec, 05-552 Magdalenka, Poland

<sup>3</sup>National Research Institute of Animal Production 1, Krakowska Street, 32-083 Balice n/Krakow, Poland

<sup>4</sup>Institute of Molecular Genetics (IGMM), CNRS UMR-5535 and University of Montpellier, 1919 route de Mende, 34293 Montpellier, France

<sup>5</sup>INSERM, U823, Institut Albert Bonniot, Université Grenoble Alpes, 38700 Grenoble, France

<sup>6</sup>Co-first author

\*Correspondence: [ploi@unite.it](mailto:ploi@unite.it)

<http://dx.doi.org/10.1016/j.celrep.2015.10.066>

This is an open access article under the CC BY-NC-ND license (<http://creativecommons.org/licenses/by-nc-nd/4.0/>).

## SUMMARY

Protamines confer a compact structure to the genome of male gametes. Here, we find that somatic cells can be remodeled by transient expression of protamine 1 (Prm1). Ectopically expressed Prm1 forms scattered foci in the nuclei of fibroblasts, which coalesce into spermatid-like structures, concomitant with a loss of histones and a reprogramming barrier, H3 lysine 9 methylation. Protaminized nuclei injected into enucleated oocytes efficiently underwent protamine to maternal histone TH2B exchange and developed into normal blastocyst stage embryos *in vitro*. Altogether, our findings present a model to study male-specific chromatin remodeling, which can be exploited for the improvement of somatic cell nuclear transfer.

## INTRODUCTION

Spermatogenesis is conserved from flies to mammals. Post-meiotic spermatocytes undergo a radical nuclear and cytoplasmic reorganization. Nuclear remodeling relies on a timely translation of stabilized mRNA transcribed at the round spermatid stage (Brock *et al.*, 1980). The first transcripts are testis-specific core and linker histone variants (Gaucher *et al.*, 2010; Kota and Feil 2010). Testis-specific histones have a lower affinity for DNA than somatic ones (Gaucher *et al.*, 2010), and their subsequent post-translational modification (Goudarzi *et al.*, 2014; Rousseaux and Khochbin, 2015; Morinière *et al.*, 2009) further destabilizes the nucleosome. Subsequently, acetylated histones are recognized by bromodomain testis-specific proteins (Brd1) (Pivot-Pajot *et al.*, 2003; Gaucher *et al.*, 2012), proteins that prepare the ground for the incorporation of transition proteins (TPs). TPs cooperate with topoisomerases to relieve torsional stress (Singh and Rao, 1988) and with DNA repairing enzymes (Akama

*et al.*, 1999). The substitution of TPs with protamine (Prm) completes nuclear remodeling, conferring a toroid structure to DNA and the unique shape of male gametes (Miller *et al.*, 2010). Upon fertilization, remodeling is completely reversed. Paternal chromosomes rapidly lose Prm and testis-specific histones (van der Heijden *et al.*, 2005; Wu *et al.*, 2008; Loppin *et al.*, 2005) and regain a nucleosomal organization built upon maternally provided histones.

When, instead, a somatic cell is used to “fertilize” an oocyte, as in somatic cell nuclear transfer (SCNT; Wilmut *et al.*, 1997), the nucleosome organization of the chromatin is only occasionally reversed by the oocyte, often leading to developmental failure (Loi *et al.*, 2013).

The current study set out to explore the possibility of conferring a somatic cell nucleus with a Prm-based toroid organization. Here, we demonstrate that the nuclei of adult somatic cells undergo a dramatic chromatin reorganization following the induced expression of the Prm1 gene, transforming the nuclei into “spermatid-like” structures. The Prm-induced nuclear remodeling is reversible upon nuclear transfer (NT) of protaminized cells into enucleated oocytes, and the resulting embryos develop normally *in vitro*.

## RESULTS

### Spermatid-Specific Stepwise Chromatin Remodeling Does Not Function in Somatic Cells

Our first approach to remodel somatic cell nuclei was to induce the co-sequential and sequential expression of four main testis-specific genes in primary cultures of sheep fibroblasts, with the aim to repeat the nuclear remodeling occurring in spermatids. To this end, expression vectors for the bromodomain testis-specific (Brd1-GFP tag), TPs I and II (HA tag), and protamine 1 (Prm1-red variant of GFP tag) were generated and transfected into the fibroblasts. However, our attempts to induce chromatin remodeling of somatic cells following either a co-stepwise or a stepwise transfection of all four expression vectors failed.

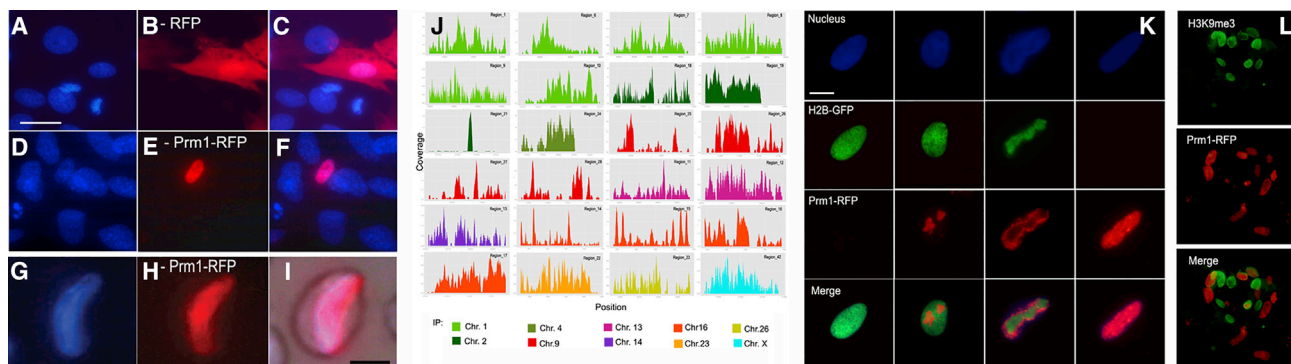

**Figure 1. Ectopic Prm1 Binds to Somatic DNA, Replaces the Histones, and Changes Completely Nuclear Morphology**

(A–F) Nuclear incorporation of Prm1 in somatic chromatin. This shows tracking the RFP tag in cells transfected with pTag-RFP (A–C) and pPrm1-RFP (D–F); (A and D) Nuclei. (B) RFP. (E) Prm1-RFP localizations. (C and F) Merge. Scale bar represents 10  $\mu$ m.

(G–I) Elongated nucleus in pPrm1-RFP-transfected cells. Scale bar represents 10  $\mu$ m.

(J) ChIP-seq profiles in genomic regions of different chromosomes for pPrm1-RFP in transfected cells (after peak calling the represented genomic regions from pPrm1-RFP sample are enriched than input samples).

(K) Histones/Prm exchange in H2B-GFP fibroblasts: nuclei (blue); H2A.B-GFP (green); Prm1-RFP (red); Merge H2A.B+Prm1. (Left to right) The gradual incorporation (0-, 16-, 24-, 48-hr post-transfection) of Prm1 into somatic nuclei. H3K9me3/Prm exchange (L) was as follows: H3K9me3 (green), Prm1-RFP (red), and Merge H3K9me3+ Prm1.

The nuclear reorganization in spermatids relies on a hierarchic translation of synthesized mRNA, and each of the protein prepares the ground for the next one (Barckmann et al., 2013), a scenario we failed to repeat in cultured somatic cells. There are, however, exceptions to the canonical nucleosome disassembly pathway during spermatogenesis. In the male germline of the cephalopod *Sepia officinalis*, for instance, histones are replaced directly by Prm-like proteins (Martínez-Soler et al., 2007). Hence, we attempted to induce a direct nuclear remodeling in somatic cells through the transient expression of Prm. We selected Prm1 because ram spermatozoa contain Prm1 only and because Prm1 is synthesized as a mature protein with no further processing (de Mateo et al., 2011).

### Direct Incorporation of Prm1 into Somatic Chromatin

We transfected sheep adult fibroblasts (SAFs) with pPrm1-RFP, WT Prm1, and RFP tag-only vectors using a lipofectamine transfection kit. Transfected cells approached 40% in all three groups. Expression of mRNA and protein Prm1 was confirmed by RT-PCR, by western blotting, and by tracking the RFP-tag (Figures 1, S1A, and S1B). Prm1-RFP co-localized with nuclei stained by Hoechst (Figure 1), whereas in control, i.e., pRFP transfected fibroblasts, the red signal was diffused in the cytoplasm and nucleus (Figure 1). Fibroblasts transfected with WT Prm1 showed nuclear reorganization similar to that detected in pPrm1-RFP transfected ones (Figures 1 and S2). At 40- to 48-hr post-transfection/trichostatin A (TSA) treatment, 93.3% of Prm1-cells did uptake Prm in nuclei, and 83.3% of Prm1-positive cells completely changed nuclear morphology (Table 1).

### Prm1 Binds to DNA

Prm1 contains numerous cysteine residues that might form intra-Prm/inter-Prm disulfide cross-links (Balhorn et al., 1992). To exclude nuclear Prm1 polymerization, chromatin immunoprecipitation (ChIP)-seq assay was carried on of sorted Prm1-positive

cells. The ChIP-seq assay confirmed the effective binding of Prm1 to DNA at 42 DNA binding sites on 10 of 27 chromosomes, as early as 16-hr post-pPrm1 transfection (Figure 1J; Table S1).

### Protamination of Somatic Cells' Nuclei Is Not Cell Cycle Dependent

Cell-cycle analysis by cytofluorimetry of transfected cells revealed that Prm1 was incorporated in all cell-cycle stages (72.6% G1, 4.4% S, 23% G2 stage) (Table S2). Moreover, fibroblasts forced to enter G0 (by serum starvation) were transfected with pPrm1-RFP, and even in this case, Prm1 incorporation and chromatin compaction took place (Table 1). Thus, Prm incorporation on DNA is cell cycle independent. A likely mechanism for Prm1 deposition on chromatin might be the conformational changes that nucleosomes undergo as a result of chromatin remodeling enzymes or thermal fluctuations (Chereji and Morozov, 2015). These nucleosomal dynamics make available free stretches of 11 bp between the dyads, enough for Prm1 docking on DNA (Zhang et al., 1996). The low-off rates of Prm1 (Brewer et al., 2003) might facilitate the prolonged condensation of DNA even after transient Prm1 expression. To indirectly test this hypothesis, we transfected GFP-H2B fibroblasts with Prm1-RFP. A histone-to-Prm exchange was observed in GFP-H2B nuclei 48 hr after Prm1 transfection (Figure 1K). Unequivocally, the red fluorescent signal of Prm replaced the green H2B, confirming the over competition of Prm on histones (Figure 1K). Furthermore, we observed that the Prm replaced the histone H3 trimethylated on lysine 9 (H3K9me3), a critical epigenetic barrier of SCNT reprogramming in 30% (36 of 120) of Prm-positive cells (Figure 1L). H3K9me3 was no longer detectable in fully condensed nuclei totally devoid of H3K9me3.

### Dynamics of Prm1 Incorporation

Prm1 assembly on DNA of somatic cells leads to an overlapping of nuclear morphology like the one found in elongating

**Table 1. Incorporation of Prm1 in Somatic Nuclei 16 to 48 hr Post-transfection**

| Hours Post-transfection | Group  | Prm1 Not in Nucleus | Prm1 Spots in Nucleus      | Prm1 in Whole Nucleus       |
|-------------------------|--------|---------------------|----------------------------|-----------------------------|
| 16–20 hr                | CTR    | 15/147 (10.2%)      | 94/147 (63.9%)             | 38/147 (25.8%)              |
|                         | TSA    | 4/69 (5.8%)         | 32/69 (46.3%) <sup>a</sup> | 33/69 (47.8%) <sup>b</sup>  |
|                         | G0     | 4/80 (5%)           | 52/80 (65%)                | 24/80 (30%)                 |
|                         | G0 TSA | 2/74 (2.7%)         | 40/74 (54%)                | 32/74 (43.2%)               |
| 40–48 hr                | CTR    | 33/191 (17.3%)      | 42/191 (21.9%)             | 116/191 (60.8%)             |
|                         | TSA    | 4/60 (6.7%)         | 6/60 (10%) <sup>c</sup>    | 50/60 (83.3%) <sup>d</sup>  |
|                         | G0     | 6/63 (9.5%)         | 21/63 (33.3%)              | 36/63 (57.14%)              |
|                         | G0 TSA | 6/102 (5.9%)        | 21/102 (20.6%)             | 75/102 (73.5%) <sup>e</sup> |

<sup>a</sup>CTR versus TSA,  $p = 0.0179$ .

<sup>b</sup>CTR versus TSA,  $p = 0.0018$ , Fisher's exact test.

<sup>c</sup>CTR versus TSA  $p = 0.0399$ .

<sup>d</sup>CTR versus TSA,  $p = 0.0010$ .

<sup>e</sup>G0 versus G0 TSA,  $p = 0.0401$ , Fisher's exact test.

spermatids (Figures 1G–1I). Prm1 appears in foci scattered throughout the nucleus 20-hr post-transfection (Figure 2B) and fully coalescences 48 hr later in an elongated structure (Table 1). The final outcome is an elongated and flattened nucleus, very much similar to the spermatozoa's, but larger, due to the diploid DNA content (Figure 2I). The degree of nuclear compaction in protaminized somatic cells approaches that of spermatozoa when observed by transmission electron microscopy (TEM) (Figures 2F–2G).

Histone hyperacetylation opens chromatin structure in spermatids and is a pre-requisite for histone/Prm replacement. Accordingly, transfected cells treated with TSA incorporated more and faster Prm1 than control without TSA (at 16- to 20-hr post-transfection: TSA 47.8% [33 of 69]; without TSA 25.8% [38 of 147],  $p = 0.0018$ ; at 40–48 hr: TSA 83.3% [50 of 60]; without TSA 60.8% [116 of 191],  $p = 0.0010$ ; Table 1).

Physiologically, the massive DNA compaction proper of spermatozoa is achieved through the induction of double strand DNA breaks and repair (Rathke et al., 2014). Therefore, we tested whether the same would apply to our forced conversion of somatic chromatin to a protaminized structure. We analyzed via immunofluorescence the nuclei for the presence of the histone variant  $\gamma$ H2A.X (a marker of double-strand DNA breaks) around the Prm1 condensed foci, but no positive  $\gamma$ H2A.X signal was detected (H2A.X positive: CTR 10.2% [6 of 59]; CTR + [UV irradiated] 63.2% [48 of 76]; Prm1-RFP 10% [6 of 60]; Prm1-RFP/TSA 12.5% [8 of 64]; Figure 2J). A comet assay also excluded the presence of DNA fragmentation in fully protaminized fibroblasts (Figure S3).

Protaminized cells showed signs of degeneration on the third day after transfection, likely a consequence of the global transcription shut down resulting from chromatin compaction (Figure 2C).

### Prm-to-Histone Transition after NT

Finally, we wanted to verify the reversibility of genome protaminization using NT as a biological assay (Figure 3C, a and a1). A large pronucleus was observed in the injected oocytes starting 6 hr after activation and swelling in size ( $16.2 \pm 2.3 \mu\text{m}$ ) by 8 hr. Meanwhile, Prm progressively disappeared in the pronuclei of

77% of injected oocytes (28 of 36; Figure 3A) and replaced by TH2B (Figure 3B), an oocyte-specific histone variant that plays a key role in nuclear reprogramming (Shinagawa et al., 2014; Montellier et al., 2013). Hence, protaminized somatic nuclei decondense and reacquire a nucleosomal organization following a physiological path after artificial activation of the injected oocyte.

The enucleated oocytes reconstructed with protaminized somatic nuclei were further cultured in vitro in seven separated replicates, indicating their full competence to direct early embryonic cleavages until the blastocyst stage (Figure 3C, a2). The quality of the embryos (total cell count and karyotype) was comparable to that of normal in vitro fertilized embryos (Figure 3D).

## DISCUSSION

Here, we have found that ectopic expression of Prm remodels the interphase chromatin of somatic cells, leading to a nuclear compaction strikingly similar to that of elongated spermatids. The absence of  $\gamma$ H2AX immune localization was surprising, for it is hardly conceivable a genome-wide protaminization without torsional stress alleviation through DNA double-strand breaks (Laberge and Boissonneault, 2005). Probably, other DNA repairing enzymes not tested here might be involved; accordingly,  $\gamma$ H2AX has not been detected during chromatin remodeling in human spermatids (De Vries et al., 2012). Another possibility is that the histone variant  $\gamma$ H2AX might have been evicted by Prm binding; however, a comet assay of fully protaminized cells excluded major DNA damage (Figure S3).

The ChIP-seq dataset demonstrated the effective binding of Prm1 to DNA on 42 DNA binding sites on 10 out of 27 chromosomes ( $2n = 54$  in sheep) (Figure 2J; Table S1). Binding occurred in 28 gene-rich domains—14 (50%) genic and 14 (50%) intergenic—while the other 14 were classified as scaffold (Table S1).

Early nuclear remodeling in round human spermatids is marked by the appearance of a single doughnut-like structure. The doughnut is the morphological expression of nucleosome disassembly, for nucleosome-destabilizing histones (H4K8ac and H4K16ac, H3K9me2) co-localize with it (De Vries et al., 2012). These findings suggest that genome remodeling starts

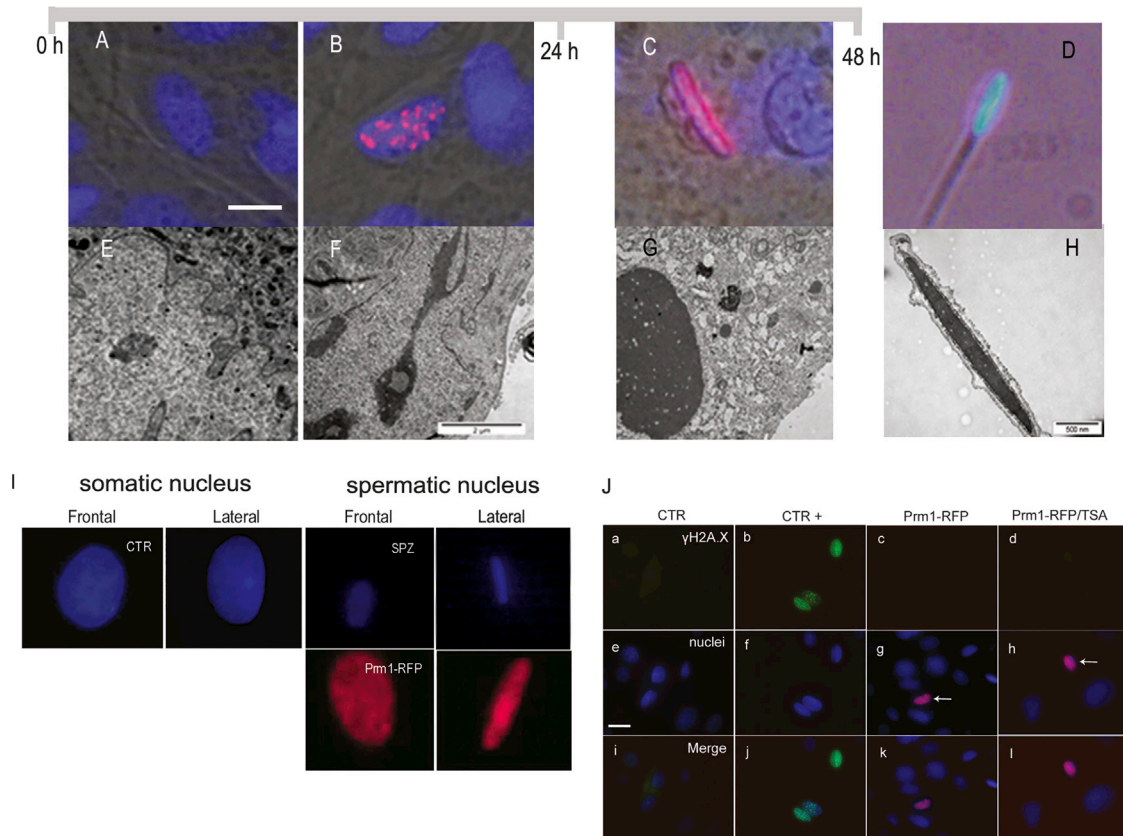

**Figure 2. The Gradual Prm1 Incorporation Leads to Nuclear Compaction Similar to that of Elongated Spermatisms without Causing DNA Brakes**

(A–C; E–G) Timing of incorporation of Prm in somatic nuclei. This is a representation of post-transfection incorporation of Prm in somatic nuclei. pPrm1-RFP-Prm plasmide is tagged with RFP.

(A) Nuclei (Hoechst, blue) of fibroblasts before the transcription of Prm1.

(B) Incorporation of Prm1 in nucleus 16- to 20-hr post-transfection, visible as red spots.

(C) Complete incorporation of Prm1 in nucleus 40- to 48-hr post-transfection. Prm1 is red, and nuclei are blue.

(E–G) TEM analysis of adult sheep fibroblasts transfected with pPrm1-RFP.

(E) Nucleus of fibroblasts before the transcription of Prm1.

(F) Nucleus of fibroblast after 16- to 20-hr post-transfection. Visible partial compaction of chromatin is seen.

(G) Nucleus of fibroblasts after 40- to 48-hr post-transfection. Visible complete chromatin compaction is seen. Bars represent 8  $\mu$ m (A) and 2  $\mu$ m (F).

(D and H) Nucleus of spermatozoa stained with Hoechst (D) and analyzed by TEM (H). Scale bar represents 500 nm.

(I) Representation of nucleus of control (CTR) and Prm-transfected cells (Prm1-RFP) from frontal and lateral view. Nucleus of spermatozoa has been use as a control (SPZ).

(J) DNA double-strand breaks in sheep fibroblasts transfected with pPrm1-RFP visualized by  $\gamma$ H2A.X immunostaining. (a, e, and i) Control adult fibroblasts. (b, f, and j) Positive control: adult fibroblasts irradiated with UV light. (c, g, and k) Adult fibroblasts 20-hr post-transfection with pPrm1-RFP (red). (d, h, l) Adult fibroblasts treated with TSA and transfected with pPrm1-RFP. Stained with antibody anti- $\gamma$ H2A.X. Scale bar represents 10  $\mu$ m.

at a defined site in the genome and spreads in a spatially regulated manner, ending up with the nuclear compaction found universally in male gametes. Live imaging of the histone-to-Prm transition could be a powerful tool to test this hypothesis, but it is only available in *Drosophila* (Awe and Renkawitz-Pohl, 2010), not in mice or man. Also, currently unavailable are in vitro models to monitor the whole process of spermatogenesis.

The protaminization of somatic cells might provide unique insights on the early steps of chromatin remodeling, allowing the identification of the very first genome domain(s) binding with Prm. The simplified model for nucleosome-to-Prm exchange reported here might also add to the ongoing debate on nucleo-

somal retention in male gametes (Samans et al., 2014; Weiner et al., 2015). It would be interesting to map on a genome-wide scale, the Prm-histones' footprints on Prm1-expressing somatic cells, to see whether the pattern described in spermatozoa is conserved.

Our findings also impact SCNT (Wilmut et al., 1997). SCNT is a promising technology whose full implementation is on hold because of its low efficiency. Recent successes on human embryonic stem cells isolated from somatic cell-derived cloned embryos have boosted interest in SCNT (Tachibana et al., 2013; Chung et al., 2014). This renewed interest in SCNT goes along with targeted nuclear reprogramming strategies, like

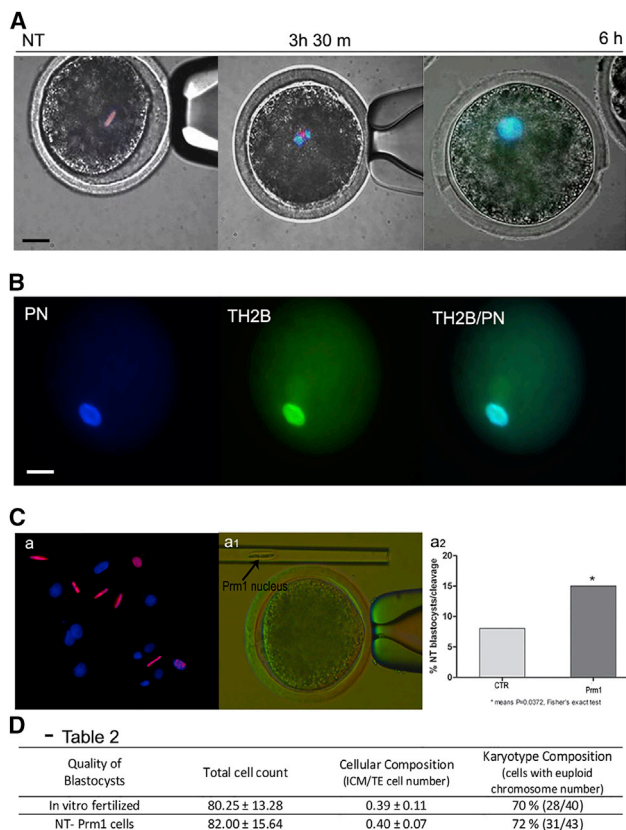

**Figure 3. Protaminized Somatic Nuclei Re-acquire a Nucleosome Organization after Nuclear Transfer**

(A) Displacement Prrm1 during pronucleus formation after nuclear transfer (NT). Scale bar represents 20  $\mu$ m. Prrm1 is red, and nucleus is blue.  
 (B) Incorporation TH2B in pronucleus (PN) after NT of protaminized nuclei: pronucleus (PN, blue), TH2B (green), Merge (TH2B/PN). Scale bar represents 20  $\mu$ m.  
 (C) SCNT of fibroblast transfected with pPrrm1-RFP. (a) Picture represents Prrm1 (red)-positive fibroblasts used as donors for SCNT. (a1) Protaminized nucleus in injected capillary before nuclear transfer into enucleated MII sheep oocyte. (a2) In vitro development of nuclear transfer embryos.  
 (D) Table 2. Quality of blastocysts is as follows: IVF, in vitro fertilized; NT Prrm1 cells. Total cell number is mean  $\pm$  SD. Cellular composition is the number of inner cell mass/trophoblast cell number. Karyotype composition is the cell with euploid chromosome number divided by total cells (%).

RNAi-mediated downregulation of Xist (Ogura et al., 2013; Matoba et al., 2011) or the depletion of H3K9 methyltransferases in somatic cells before NT (Matoba et al., 2014). In vitro protaminization of somatic cells simplifies the nuclear structure of a somatic cell enormously, formatting it in a way that is easily readable by the oocytes and thus holds potential to improve SCNT efficiency.

## EXPERIMENTAL PROCEDURES

### Cell Culture

SAFs were derived from ear biopsy of three female Sarda breed sheep (2 years old). SAFs (between second and eighth passage) were cultured in DMEM (GIBCO) containing 10% fetal bovine serum (FBS), 2 mM glutamine, 3.7 g/L NaHCO<sub>3</sub>, and 0.5% gentamicin.

### Plasmids Construction

Sperm Prrm1 cDNA (GenBank: NM\_002761.2) was amplified from a human testis cDNA library with appropriate primes and cloned into a pTagRFP vector (Evrogen). The identity of the cloned cDNA and its in-frame cloning C-terminal to RFP was verified by sequencing. Mouse TP1 and TP2 cDNAs were amplified by PCR from testis total RNA and cloned in a Ha-tagged pcDNA vector (derived from a Life Technologies pcDNA His-tagged vector). The GFP-Brdt construct is described in Pivot-Pajot et al. (2003) and Gaucher et al. (2012).

### Transfection

SAFs at 80% confluence were transfected with 3  $\mu$ g of pBrdT-GFP, pTP1, pTP2, pPrrm1-RFP, pPrrm1, or pRFP by Lipofectamine 2000 (Invitrogen), according to the manufacturer's instructions. At 4-hr post-transfection, medium was changed for DMEM containing 5 nM TSA or control (no TSA), and SAFs were cultured for additional 16, 20, 40, 48 hr. For cell-cycle analysis, SAFs before transfection were starved with 0.5% FBS for 5 days.

### Histone Exchange Visualization

To visualize histone-to-Prrm exchange, SAFs were first transfected with construct expressed GFP fused to histone 2B using BacMam 2.0 Technology (C10594, Celllight Histone 2B-GFP, BacMam 2.0, Life Technologies) according to the manufacturer's instructions and then with pPrrm1-RFP, as described above. Histone 2B-GFP and Prrm1-RFP behavior in live cells using fluorescent imaging were observed.

### TEM

Cells were fixed in glutaraldehyde (2.5% in 0.1 M cacodylate buffer [pH 7.4]) for 24 hr. After washing in ddH<sub>2</sub>O, cells were post-fixed in 2% OsO<sub>4</sub> in ddH<sub>2</sub>O for 2 hr. Next, cells were dehydrated through a graded series of ethanol solutions (30%, 10 min; 50%, 15 min; 70%, 24 hr; 80%, 10 min; 96%, 10 min; 100%, 10 min; acetone, twice for 15 min) and were infiltrated with graded concentrations of Epoxy 812 Resin (EPON) resin in 100% acetone (1:3, 20 min; 1:1, 24 hr; 3:1, 2 hr), infused twice for 1 hr in pure EPON resin, and polymerized at 65°C for 24 hr. Next, 60-nm sections were prepared and examined using a LEO 912AB electron microscope. Images were captured using a Slow Scan CCD camera (Proscan) and EsiVision Pro 3.2 software (Soft Imaging Systems GmbH).

### Immunostaining

#### $\gamma$ H2A.X and Trimethyl-HistoneH3

Cells were fixed in 4% paraformaldehyde (PFA) for 15 min, permeabilized with 0.1% (v/v) Triton X-100 in PBS for 30 or 20 min, and blocked (0.1% BSA/0.05% Tween 20 [v/v] in PBS) for 1 hr at room temperature (RT). Then cells were incubated with the anti-phospho-Histone H2A.X (Ser139) ( $\gamma$ H2A.X) mouse antibody (1:100) (05-636, Millipore) at RT for 2 hr or anti-Trimethyl-HistoneH3 (Lys9) rabbit antibody (1:200) (07-523, Millipore) at 4°C overnight. Subsequently, the secondary anti-mouse IgG-FITC (1:100) or anti-rabbit IgG-FITC (1:200) was added for 2 hr or 50 min at RT. Nuclei were counterstained with 5  $\mu$ g/ml of 4',6-diamidin-2-fenilindolo (DAPI).

### ChIP-seq Assay

#### Chromatin Immunoprecipitation

ChIP assay was performed with the EZ-Magna ChIP kit (Millipore) according to the manufacturer's instructions with minor modification. Protein and DNA complexes from pPrrm1-RFP-transfected cells were cross-linked with 0.5% formaldehyde for 10 min at RT. Sonications were done in nuclear buffer (six 30-s pulses, power setting 10 and six 30-s pulses, power setting 15 in ice with 50-s rest between pulses; Bandelin Sonopuls). Soluble chromatin was immunoprecipitated with anti-RFP antibody (Evrogen) directly conjugated with Magnetic Protein A beads. DNA and protein immune complexes were eluted and reverse cross-linked, and then DNA was extracted using a spin filter column. DNA obtained from pRFP, pPrr1-RFP, and Input were subjected to ChIP sequencing.

### ChIP Sequencing

Next-generation sequencing experiments, comprising samples quality control, were performed. Indexed libraries were prepared from 10 ng/each ChIP DNA

with TruSeq ChIP Sample Prep Kit (Illumina) according to the manufacturer's instructions (for details see [Supplemental Experimental Procedures](#)).

## NT

In vitro embryos production was adapted from those previously described (Ptak et al., 2002). Oocytes manipulation was carried out with a piezo-driven enucleation and injection pipette (PiezoXpert), as previously described. Enucleate oocytes were injected with a nucleus, either from CTR or a Prm1-RFP fibroblasts suspended in PBS with 6% polyvinylpyrrolidone (Sigma-Aldrich). Activation and culture of reconstructed oocytes were processed as described (Ptak et al., 2002; Iuso et al., 2013a). Qualities of obtained blastocysts were performed as described by Iuso et al. (2013b).

## TH2B Immunostaining on Pronuclear Stage Embryos

The zona pellucida of embryos at pronuclear stage (10- to 12-hr post-activation) was removed by incubation in 0.5% (w/v) pronase and acid Tyrode's solution for 30 s. Then embryos were fixed in 4% PFA for 15 min and subjected to immunofluorescence analysis as described in Torres-Padilla et al. (2006) with the rabbit anti-TH2B antibody (1:700, ab23913 Abcam). Finally, zygotes were mounted with VectaShield mounting medium with 5 µg/ml of DAPI.

## Statistical Analyses

The Fisher's exact were used to compare quantitative data on nuclear incorporation of Prm1 and in vitro development. Statistical analyses were performed using GraphPad Prism 5.0 software.

## SUPPLEMENTAL INFORMATION

Supplemental Information includes Supplemental Experimental Procedures, three figures, and two tables and can be found with this article online at <http://dx.doi.org/10.1016/j.celrep.2015.10.066>.

## AUTHOR CONTRIBUTIONS

P.L., D.I., M.C., and S.K. conceived the experiments. D.I. and M.C. performed all NT and characterization work of Prm cells, and M.C. performed the vector expressions and F.Z. did the embryological work. G.E.P. supervised the embryological work and discussed the results. P.T. and A.F. performed the molecular work. S.H. cloned Prm. T.B., S.C., and H.S. performed TH2B immunofluorescence and microscopy of the injected eggs. R.F. designed and interpreted the data. P.L., D.I., M.C., S.K., and R.F. wrote the manuscript.

## ACKNOWLEDGMENTS

Work in SK's laboratory is supported by ANR EpiSperm2, INCa. H.S. is a recipient of a Marie Curie Initial Training Network grant funded by the European Commission (FP7-PEOPLE-2011-ITN and PITN-GA-289880). This work was supported by the European Research Council (FP7/2007-2013) programme IDEAS GA 210103 to G.E.P; the European Research Council, program FP7-KBBE-2012.1.3-04 GA 312097 (FECUND) to GP; and MIUR/CNR, program FIRB GA B81J12002520001 (GenHome) to P.L. The authors are participating in the COST action FA 1201 "Epiconcept" Epigenetic and Peri-conception Environment. A warm acknowledgment goes to Prof. Heiner Niemann and Dr. Bjoern Petersen (Institute of Farm Animal Genetics, FLI Mariensee) for plasmid amplification at the very beginning of this study and to Dr. Francesco Mosca (University of Teramo) for his assistance in flow cytometric analysis.

Received: May 22, 2015

Revised: September 4, 2015

Accepted: October 21, 2015

Published: November 25, 2015

## REFERENCES

- Akama, K., Kondo, M., Sato, H., and Nakano, M. (1999). Transition protein 4 from boar late spermatid nuclei is a topological factor that stimulates DNA-relaxing activity of topoisomerase I. *FEBS Lett.* *442*, 189–192.
- Awe, S., and Renkawitz-Pohl, R. (2010). Histone H4 acetylation is essential to proceed from a histone- to a protamine-based chromatin structure in spermatid nuclei of *Drosophila melanogaster*. *Syst Biol Reprod Med* *56*, 44–61.
- Balhorn, R., Corzett, M., and Mazrimas, J.A. (1992). Formation of intraprotamine disulfides in vitro. *Arch. Biochem. Biophys.* *296*, 384–393.
- Barckmann, B., Chen, X., Kaiser, S., Jayaramaiah-Raja, S., Rathke, C., Dottermusch-Heidel, C., Fuller, M.T., and Renkawitz-Pohl, R. (2013). Three levels of regulation lead to protamine and Mst77F expression in *Drosophila*. *Dev. Biol.* *377*, 33–45.
- Brewer, L., Corzett, M., Lau, E.Y., and Balhorn, R. (2003). Dynamics of protamine 1 binding to single DNA molecules. *J. Biol. Chem.* *278*, 42403–42408.
- Brock, W.A., Trostle, P.K., and Meistrich, M.L. (1980). Meiotic synthesis of testis histones in the rat. *Proc. Natl. Acad. Sci. USA* *77*, 371–375.
- Chereji, R.V., and Morozov, A.V. (2015). Functional roles of nucleosome stability and dynamics. *Brief. Funct. Genomics* *14*, 50–60.
- Chung, Y.G., Eum, J.H., Lee, J.E., Shim, S.H., Sepilian, V., Hong, S.W., Lee, Y., Treff, N.R., Choi, Y.H., Kimbrel, E.A., et al. (2014). Human somatic cell nuclear transfer using adult cells. *Cell Stem Cell* *14*, 777–780.
- de Mateo, S., Ramos, L., de Boer, P., Meistrich, M., and Oliva, R. (2011). Protamine 2 precursors and processing. *Protein Pept. Lett.* *18*, 778–785.
- De Vries, M., Ramos, L., Housein, Z., and De Boer, P. (2012). Chromatin remodelling initiation during human spermiogenesis. *Biol. Open* *1*, 446–457.
- Gaucher, J., Reynoird, N., Montellier, E., Boussouar, F., Rousseaux, S., and Khochbin, S. (2010). From meiosis to postmeiotic events: the secrets of histone disappearance. *FEBS J.* *277*, 599–604.
- Gaucher, J., Boussouar, F., Montellier, E., Curtet, S., Buchou, T., Bertrand, S., Hery, P., Jounier, S., Depaux, A., Vitte, A.L., et al. (2012). Bromodomain-dependent stage-specific male genome programming by Brdt. *EMBO J.* *31*, 3809–3820.
- Goudarzi, A., Shiota, H., Rousseaux, S., and Khochbin, S. (2014). Genome-scale acetylation-dependent histone eviction during spermatogenesis. *J. Mol. Biol.* *426*, 3342–3349.
- Iuso, D., Czernik, M., Zacchini, F., Ptak, G., and Loi, P. (2013a). A simplified approach for oocyte enucleation in mammalian cloning. *Cell. Reprogram.* *15*, 490–494.
- Iuso, D., Czernik, M., Di Egidio, F., Sampino, S., Zacchini, F., Bochenek, M., Smorag, Z., Modlinski, J.A., Ptak, G., and Loi, P. (2013b). Genomic stability of lyophilized sheep somatic cells before and after nuclear transfer. *PLoS ONE* *8*, e51317.
- Kota, S.K., and Feil, R. (2010). Epigenetic transitions in germ cell development and meiosis. *Dev. Cell* *19*, 675–686.
- Laberge, R.M., and Boissonneault, G. (2005). On the nature and origin of DNA strand breaks in elongating spermatids. *Biol. Reprod.* *73*, 289–296.
- Loi, P., Czernik, M., Zacchini, F., Iuso, D., Scapolo, P.A., and Ptak, G. (2013). Sheep: the first large animal model in nuclear transfer research. *Cell. Reprogram.* *15*, 367–373.
- Loppin, B., Bonnefoy, E., Anselme, C., Laurençon, A., Karr, T.L., and Couble, P. (2005). The histone H3.3 chaperone HIRA is essential for chromatin assembly in the male pronucleus. *Nature* *437*, 1386–1390.
- Martínez-Soler, F., Kurtz, K., Ausió, J., and Chiva, M. (2007). Transition of nuclear proteins and chromatin structure in spermiogenesis of *Sepia officinalis*. *Mol. Reprod. Dev.* *74*, 360–370.
- Matoba, S., Inoue, K., Kohda, T., Sugimoto, M., Mizutani, E., Ogonuki, N., Nakamura, T., Abe, K., Nakano, T., Ishino, F., and Ogura, A. (2011). RNAi-mediated knockdown of Xist can rescue the impaired postimplantation development of cloned mouse embryos. *Proc. Natl. Acad. Sci. USA* *108*, 20621–20626.
- Matoba, S., Liu, Y., Lu, F., Iwabuchi, K.A., Shen, L., Inoue, A., and Zhang, Y. (2014). Embryonic development following somatic cell nuclear transfer impeded by persisting histone methylation. *Cell* *159*, 884–895.

- Miller, D., Brinkworth, M., and Iles, D. (2010). Paternal DNA packaging in spermatozoa: more than the sum of its parts? DNA, histones, protamines and epigenetics. *Reproduction* 139, 287–301.
- Montellier, E., Boussouar, F., Rousseaux, S., Zhang, K., Buchou, T., Fenaille, F., Shiota, H., Debernardi, A., Héry, P., Curtet, S., et al. (2013). Chromatin-to-nucleoprotamine transition is controlled by the histone H2B variant TH2B. *Genes Dev.* 27, 1680–1692.
- Morinière, J., Rousseaux, S., Steuerwald, U., Soler-López, M., Curtet, S., Vitte, A.L., Govin, J., Gaucher, J., Sadoul, K., Hart, D.J., et al. (2009). Cooperative binding of two acetylation marks on a histone tail by a single bromodomain. *Nature* 461, 664–668.
- Ogura, A., Inoue, K., and Wakayama, T. (2013). Recent advancements in cloning by somatic cell nuclear transfer. *Philos. Trans. R. Soc. Lond. B Biol. Sci.* 368, 20110329.
- Pivot-Pajot, C., Caron, C., Govin, J., Vion, A., Rousseaux, S., and Khochbin, S. (2003). Acetylation-dependent chromatin reorganization by BRDT, a testis-specific bromodomain-containing protein. *Mol. Cell. Biol.* 23, 5354–5365.
- Ptak, G., Clinton, M., Tischner, M., Barboni, B., Mattioli, M., and Loi, P. (2002). Improving delivery and offspring viability of in vitro-produced and cloned sheep embryos. *Biol. Reprod.* 67, 1719–1725.
- Rathke, C., Baarends, W.M., Awe, S., and Renkawitz-Pohl, R. (2014). Chromatin dynamics during spermiogenesis. *Biochim. Biophys. Acta* 1839, 155–168.
- Rousseaux, S., and Khochbin, S. (2015). Histone Acylation beyond Acetylation: Terra Incognita in Chromatin Biology. *Cell J.* 17, 1–6.
- Samans, B., Yang, Y., Krebs, S., Sarode, G.V., Blum, H., Reichenbach, M., Wolf, E., Steger, K., Dansranjav, T., and Schagdarsurengin, U. (2014). Uniformity of nucleosome preservation pattern in Mammalian sperm and its connection to repetitive DNA elements. *Dev. Cell* 30, 23–35.
- Shinagawa, T., Takagi, T., Tsukamoto, D., Tomaru, C., Huynh, L.M., Sivaraman, P., Kumarevel, T., Inoue, K., Nakato, R., Katou, Y., et al. (2014). Histone variants enriched in oocytes enhance reprogramming to induced pluripotent stem cells. *Cell Stem Cell* 14, 217–227.
- Singh, J., and Rao, M.R. (1988). Interaction of rat testis protein, TP, with nucleosome core particle. *Biochem. Int.* 17, 701–710.
- Tachibana, M., Amato, P., Sparman, M., Gutierrez, N.M., Tippner-Hedges, R., Ma, H., Kang, E., Fulati, A., Lee, H.S., Sritanandomchai, H., et al. (2013). Human embryonic stem cells derived by somatic cell nuclear transfer. *Cell* 153, 1228–1238.
- Torres-Padilla, M.E., Bannister, A.J., Hurd, P.J., Kouzarides, T., and Zernicka-Goetz, M. (2006). Dynamic distribution of the replacement histone variant H3.3 in the mouse oocyte and preimplantation embryos. *Int. J. Dev. Biol.* 50, 455–461.
- van der Heijden, G.W., Dieker, J.W., Derijck, A.A., Muller, S., Berden, J.H., Braat, D.D., van der Vlag, J., and de Boer, P. (2005). Asymmetry in histone H3 variants and lysine methylation between paternal and maternal chromatin of the early mouse zygote. *Mech. Dev.* 122, 1008–1022.
- Weiner, A., Hsieh, T.H., Appleboim, A., Chen, H.V., Rahat, A., Amit, I., Rando, O.J., and Friedman, N. (2015). High-resolution chromatin dynamics during a yeast stress response. *Mol. Cell* 58, 371–386.
- Wilmot, I., Schnieke, A.E., McWhir, J., Kind, A.J., and Campbell, K.H. (1997). Viable offspring derived from fetal and adult mammalian cells. *Nature* 385, 810–813.
- Wu, F., Caron, C., De Robertis, C., Khochbin, S., and Rousseaux, S. (2008). Testis-specific histone variants H2AL1/2 rapidly disappear from paternal heterochromatin after fertilization. *J. Reprod. Dev.* 54, 413–417.
- Zhang, X., Balhorn, R., Mazrimas, J., and Kirz, J. (1996). Mapping and measuring DNA to protein ratios in mammalian sperm head by XANES imaging. *J. Struct. Biol.* 116, 335–344.



Cell Reports

Supplemental Information

# **Exogenous Expression of Human Protamine 1 (hPrm1) Remodels Fibroblast Nuclei into Spermatid-like Structures**

**Domenico Iuso, Marta Czernik, Paola Toschi, Antonella Fidanza, Federica Zacchini,  
Robert Feil, Sandrine Curtet, Thierry Buchou, Hitoshi Shiota, Saadi Khochbin, Grazyna  
Ewa Ptak, and Pasqualino Loi**

## Supplemental Data

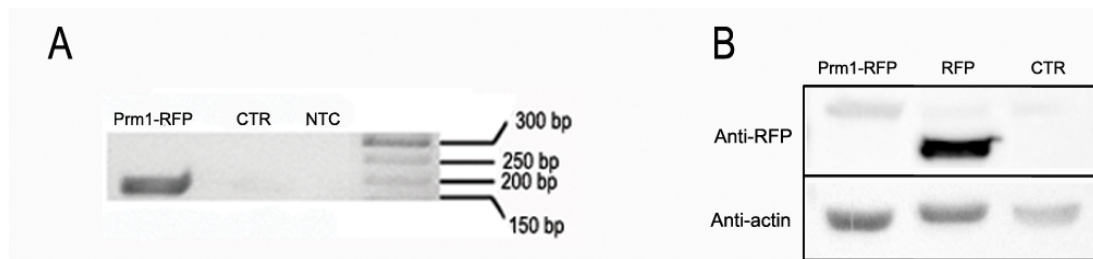

**Figure S1. Supplemental Figure 1 related to Figure 1. Confirmation of ectopic Prm1 expression in somatic cells.** A - Protamine mRNA expression in sheep adult fibroblasts (RT-PCR). Prm1-RFP: fibroblasts transfected with protamine tagged with RFP. CTR: fibroblasts not transfected. NTC: no template control; B - Protamine protein expression in adult fibroblasts (Western blot). Prm1-RFP: fibroblasts transfected with pPrm1-RFP. pTag-RFP: fibroblasts transfected with empty plasmid-RFP. CTR: fibroblasts not transfected. Immunoblotting with anti-rRFP, anti-actin were used as loading control.

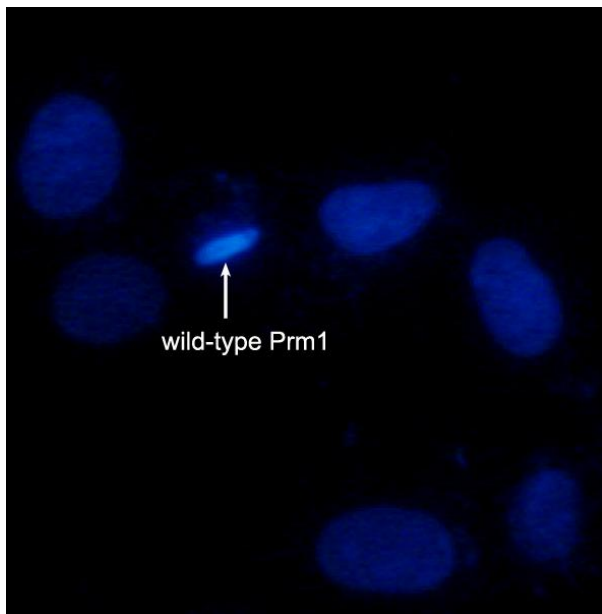

**Figure S2. Figure supplemental 2, related to Figure 1. Confirmation that fibroblasts transfected with wild-type Prm1 shows nuclear reorganization similar to the detected in pPrm1-RFP transfected ones.** Fibroblasts transfected with wild-type protamine without RFP tag.

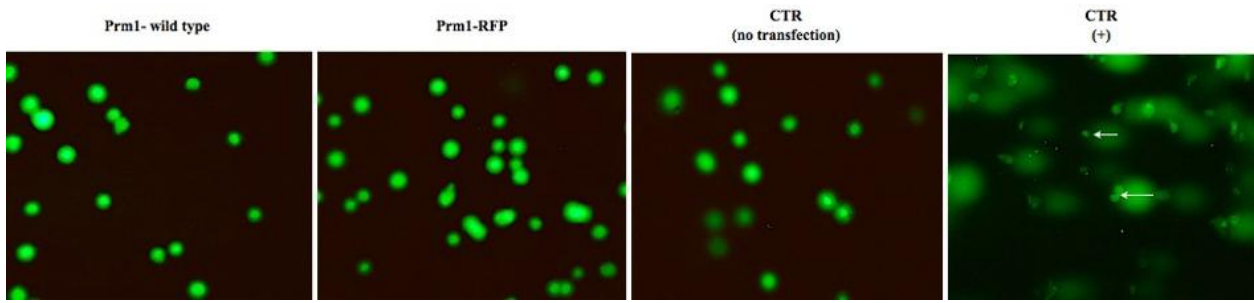

**Figure S3. Figure supplemental 3, related to Figure 2J. Comet assay excluded the presence of DNA fragmentation in fully protaminized fibroblasts.** Comet assay on Prm1-wild type, Prm1-RFP transfected cells, CTR – un-transfected cells, and CRT (+) fibroblasts treated with H<sub>2</sub>O<sub>2</sub>.

**Table S1. Table supplemental 1, related to Figure 1J.** Binding of Prm1 to DNA on 42 DNA binding sites on 10/27 chromosomes (2n=54 in sheep). Binding occurred in 28 gene-rich domains – 14 (50%) genic and 14 (50%) intergenic – while the other 14 were classified as scaffold.

**Table S2. Table supplemental 2, related to Table 1.** Incorporation of Prm1 in somatic nuclei at cell cycle stages.

| Cell Cycle | G1                 | S               | G2                |
|------------|--------------------|-----------------|-------------------|
| CTR        | 6412/8981 (64.12%) | 396/8981 (4.4%) | 2173/8981 (24.2%) |
| PR +       | 6221/8569 (72.6%)  | 375/8569 (4.4%) | 1973/8569 (23%)   |

### Supplemental Experimental Procedure

All chemicals, unless otherwise indicated, were obtained from Sigma Chemical Co.

### RNA isolation and Reverse Transcription

Poly (A) + RNA was isolated from cells using Dynabeads mRNA DIRECT kit (Invitrogen Dynal AS, Oslo, Norway) according to the manufacturer's instructions. RT was performed using 80% of the eluted Poly (A) + RNA in a total volume of 20µl using the QuantiTect Reverse Transcription Kit (Qiagen, Milan, Italy). cDNAs were diluted 1:3 in H<sub>2</sub>O. The PCR reactions were performed using the PCR Master Mix (Promega, Milano, Italy). PCR conditions: 95° 5' (95°C, 30", 58" 30°C,

72°C 30") x 35 cycles, 72°C 10 '. Primers were: FW; atggccagataccgatgct, RV; cagcatcttcgcctctc; amplicon: 160bp.

### **Flow Cytometry for Cell Cycle Assay**

Cells transfected with pPrm1 (without TagRFP) were fixed with 70% Ethanol and stained with 5 µg/ml Propidium Iodide. Red fluorescence (>630 nm) (DNA) was measured using a flow cytometer (Beckman coulter, Epics XL). Approximately 100000 cells/test were acquired at a flow rate of 400-500 events/s.

### **DNA integrity – Comet Assay**

DNA integrity was evaluated using the single cell gel electrophoresis assay (CometAssay) (Trevigen, Bologna, Italy) according to the manufacturer's instructions. Briefly, cells were diluted to a concentration of  $10^5$  cells/ml in PBS. The cells were combined with molten LM agarose at a ratio of: 1:10 (v/v), then 75 µl were placed on comet slides. The slides were put in the dark at 4°C for 10 minutes, then immersed in a pre cooled (4°C) lysis solution for 1 hour at 4°C. Afterward, the slides were immersed in a freshly prepared alkaline solution, which consisted of 0.6g NaOH pellets, 250 µl of 250mM EDTA, pH 10.0 and 49.75ml deionized water, for 60 minutes in the dark at room temperature. Finally, the slides were washed in a TBE buffer (Tris base, Boric acid and EDTA) for 5 minutes and then submerged in TBE buffer in a horizontal electrophoresis apparatus. One volt/cm was applied for 10 minutes. Each experiment was conducted using as a positive control SAF previously treated with 100 µM of hydrogen peroxide for 10 minutes at 2°C–8°C, as described in the manufacturer kit. Then samples were dried, stained with SYBR green and scored using a fluorescent microscope (Zeiss, Germany) connected to a digital camera (Sony, Japan). Obtained images were analyzed using the Image J free software (NIH, USA).

## **Chip-seq assay:**

### **Chromatin immunoprecipitation**

Chromatin immunoprecipitation (ChIP) assay was performed using the EZ-Magna ChIP kit (Millipore, Milan, Italy) according to the manufacturer's instructions with minor modification. pPrm1-RFP transfected cells were grown for 16-18h hours then harvested. Protein/DNA complexes were cross-linked with 0.5% formaldehyde for 10 minutes at RT. Cells were lysed with Lysis buffer according to the manufacturer's instructions and afterwards sonicated in nuclear buffer (six 30 sec pulses, power setting 10 and six 30 sec pulses, power setting 15 in ice with 50 seconds rest between pulses; Bandelin Sonopuls). Soluble chromatin was immunoprecipitated with anti-RFP antibody (Evrogen, Milan, Italy) directly conjugated with Magnetic Protein A beads. DNA–protein immune complexes were eluted and reverse cross-linked, and DNA was extracted using a spin filter column. DNA obtained from pRFP (negative control), pPR1-RFP (experimental sample) and input (sonicated DNA, reaction CTR) were subjected to ChIP sequencing.

### **ChIP sequencing**

Next generation sequencing experiments, comprising samples quality control, were performed. Indexed libraries were prepared from 10 ng/ea ChIP DNA with TruSeq ChIP Sample Prep Kit (Illumina) according to the manufacturer's instructions. Libraries were quantified using the Agilent 2100 Bioanalyzer (Agilent Technologies) and pooled such that each index-tagged sample was present in equimolar amounts, with final concentration of the pooled samples of 2nM. The pooled samples were subject to cluster generation and sequencing using an Illumina HiSeq 2500 System (Illumina) in a 1x50 single-end format at a final concentration of 8pmol. The raw sequence files

generated (.fastq files) underwent quality control analysis using FastQC (<http://www.bioinformatics.babraham.ac.uk/projects/fastqc/>).

Raw reads were checked for quality with FastQC v0.11.3 ([www.bioinformatics.babraham.ac.uk/projects/fastqc/](http://www.bioinformatics.babraham.ac.uk/projects/fastqc/)) and then trimming and removal of adapters were performed with Trimmomatic v0.33 (Bolger, et al., 2014). Trimmomatic: A flexible trimmer for Illumina Sequence Data. *Bioinformatics*, btu170.), minimum PHRED-quality and minimum length was set to 35 and 25nt, respectively. The obtained reads were then mapped against the *Ovis aries* genome (v3.1) with STAR v2.4.0j (A. Dobin et al, Bioinformatics 2012; doi: 10.1093/bioinformatics/bts635). Multiple mapping reads and duplicated reads were then removed from the mapping files with samtools (v0.1.19-44428cd) and Picard Tools 1.118 (<http://picard.sourceforge.net>). Peak calling was performed with Homer v4.7 (Heintz et al., 2010) separately for each immunoprecipitation using the data coming from the sonicated DNA as input. For peak calling the option 'histone' of Homer was set, the option `-minDist` was set to 3000. Distribution of coverage was calculated by using bedtools v2.17.0 (BEDTools: a flexible suite of utilities for comparing genomic features, Aaron R. Quinlan, and Ira M. Hall, Bioinformatics, 2010, 26 (6): 841-842. doi: 10.1093/bioinformatics/btq033) merging the results of the two immunoprecipitations, plots were generated with gnuplot after normalizing each dataset for the number of mapped reads.

## **Nuclear transfer**

Methods of in vitro embryo production were adapted from those previously described (Ptak et al., 2002). Oocytes were matured in vitro in a humidified atmosphere of 5% CO<sub>2</sub>/air at 39°C for 24 h. Oocytes were incubated in HEPES-buffered TCM-199 medium containing 4 mg/ml BSA, 7.5 mg/ml Cytochalasin B and 5 mg/ml Hoechst 33342 in an incubator for 15 minutes. Oocytes manipulation was carried out with a piezo-driven enucleation/injection pipette (PiezoXpert, Eppendorf). Enucleation was carried out in HEPES-buffered TCM-199 medium with 0.4% (w/v) BSA and

Cytochalasin B with a Narishige micromanipulator fitted to a Nikon Eclipse inverted microscope. No DNA vital dyes/UV irradiation was used to locate the chromosomes in the oocytes, but a blind aspiration of the cytoplasm surrounding the first polar body was conducted, and enucleation was confirmed later by Hoechst staining and UV irradiation of the aspirated cytoplasmic fragments (Iuso et al., 2014). Enucleate oocytes were allowed to recover from the Cytochalasin B treatment and then directly injected with a nucleus, either from CTR or a Prm1-RFP fibroblasts suspended in PBS with 6% Polyvinylpyrrolidone (Sigma). Reconstructed oocytes were activated in Hapes-buffered TCM-199 medium containing 5 mg/ml Ionomycin for 5 minutes and then incubated in SOF medium plus antibiotics and 0.8% BSA containing 10 mM Dimethylaminopurine and 7.5 mg/ml Cytochalasin B for 3–5 hours and cultured for 10-12 hours in SOF enriched with 1% (v:v) minimum essential medium (MEM) nonessential amino acids (Gibco, Milan, Italy), 2% (v:v) basal medium Eagle (BME) essential amino acids, 1 mM glutamine, and 8 mg/ml BSA covered with mineral oil pre-washed in SOF. Cultures were checked for embryonic development every 24 hours till day 7 post activation.

### Supplemental References

1. Bolger, A.M., Lohse, M., Usadel, B., Trimmomatic: a flexible trimmer for Illumina sequence data. *Bioinformatics*. **1**, 30 (15):2114-20 (2014).
2. Heinz, S., Benner, C., Spann, N., Bertolino, E., Lin, Y.C., Laslo, P., Cheng, J.X., Murre, C., Singh, H., Glass, C.K. (2010). Simple combinations of lineage-determining transcription factors prime cis-regulatory elements required for macrophage and B cell identities. *Mol Cell*. 38: 576-89.
3. Ptak, G., Clinton, M., Tischner, M., Barboni, B., Mattioli., M. & Loi P. Improving delivery and offspring viability of in vitro-produced and cloned sheep embryos. *Biol Reprod*. 67, 1719-1725 (2002).

4. Iuso, D., Czernik, M., Zacchini, F., Ptak, G. & Loi, P. A simplified approach for oocyte enucleation in mammalian cloning. *Cell Repr.* 15(6), 490-494 (2013).
